# Supplementary material
Source: ML conference proceedings conference paper supplement (https://openreview.net/forum?id=8MjCOMyaDf)

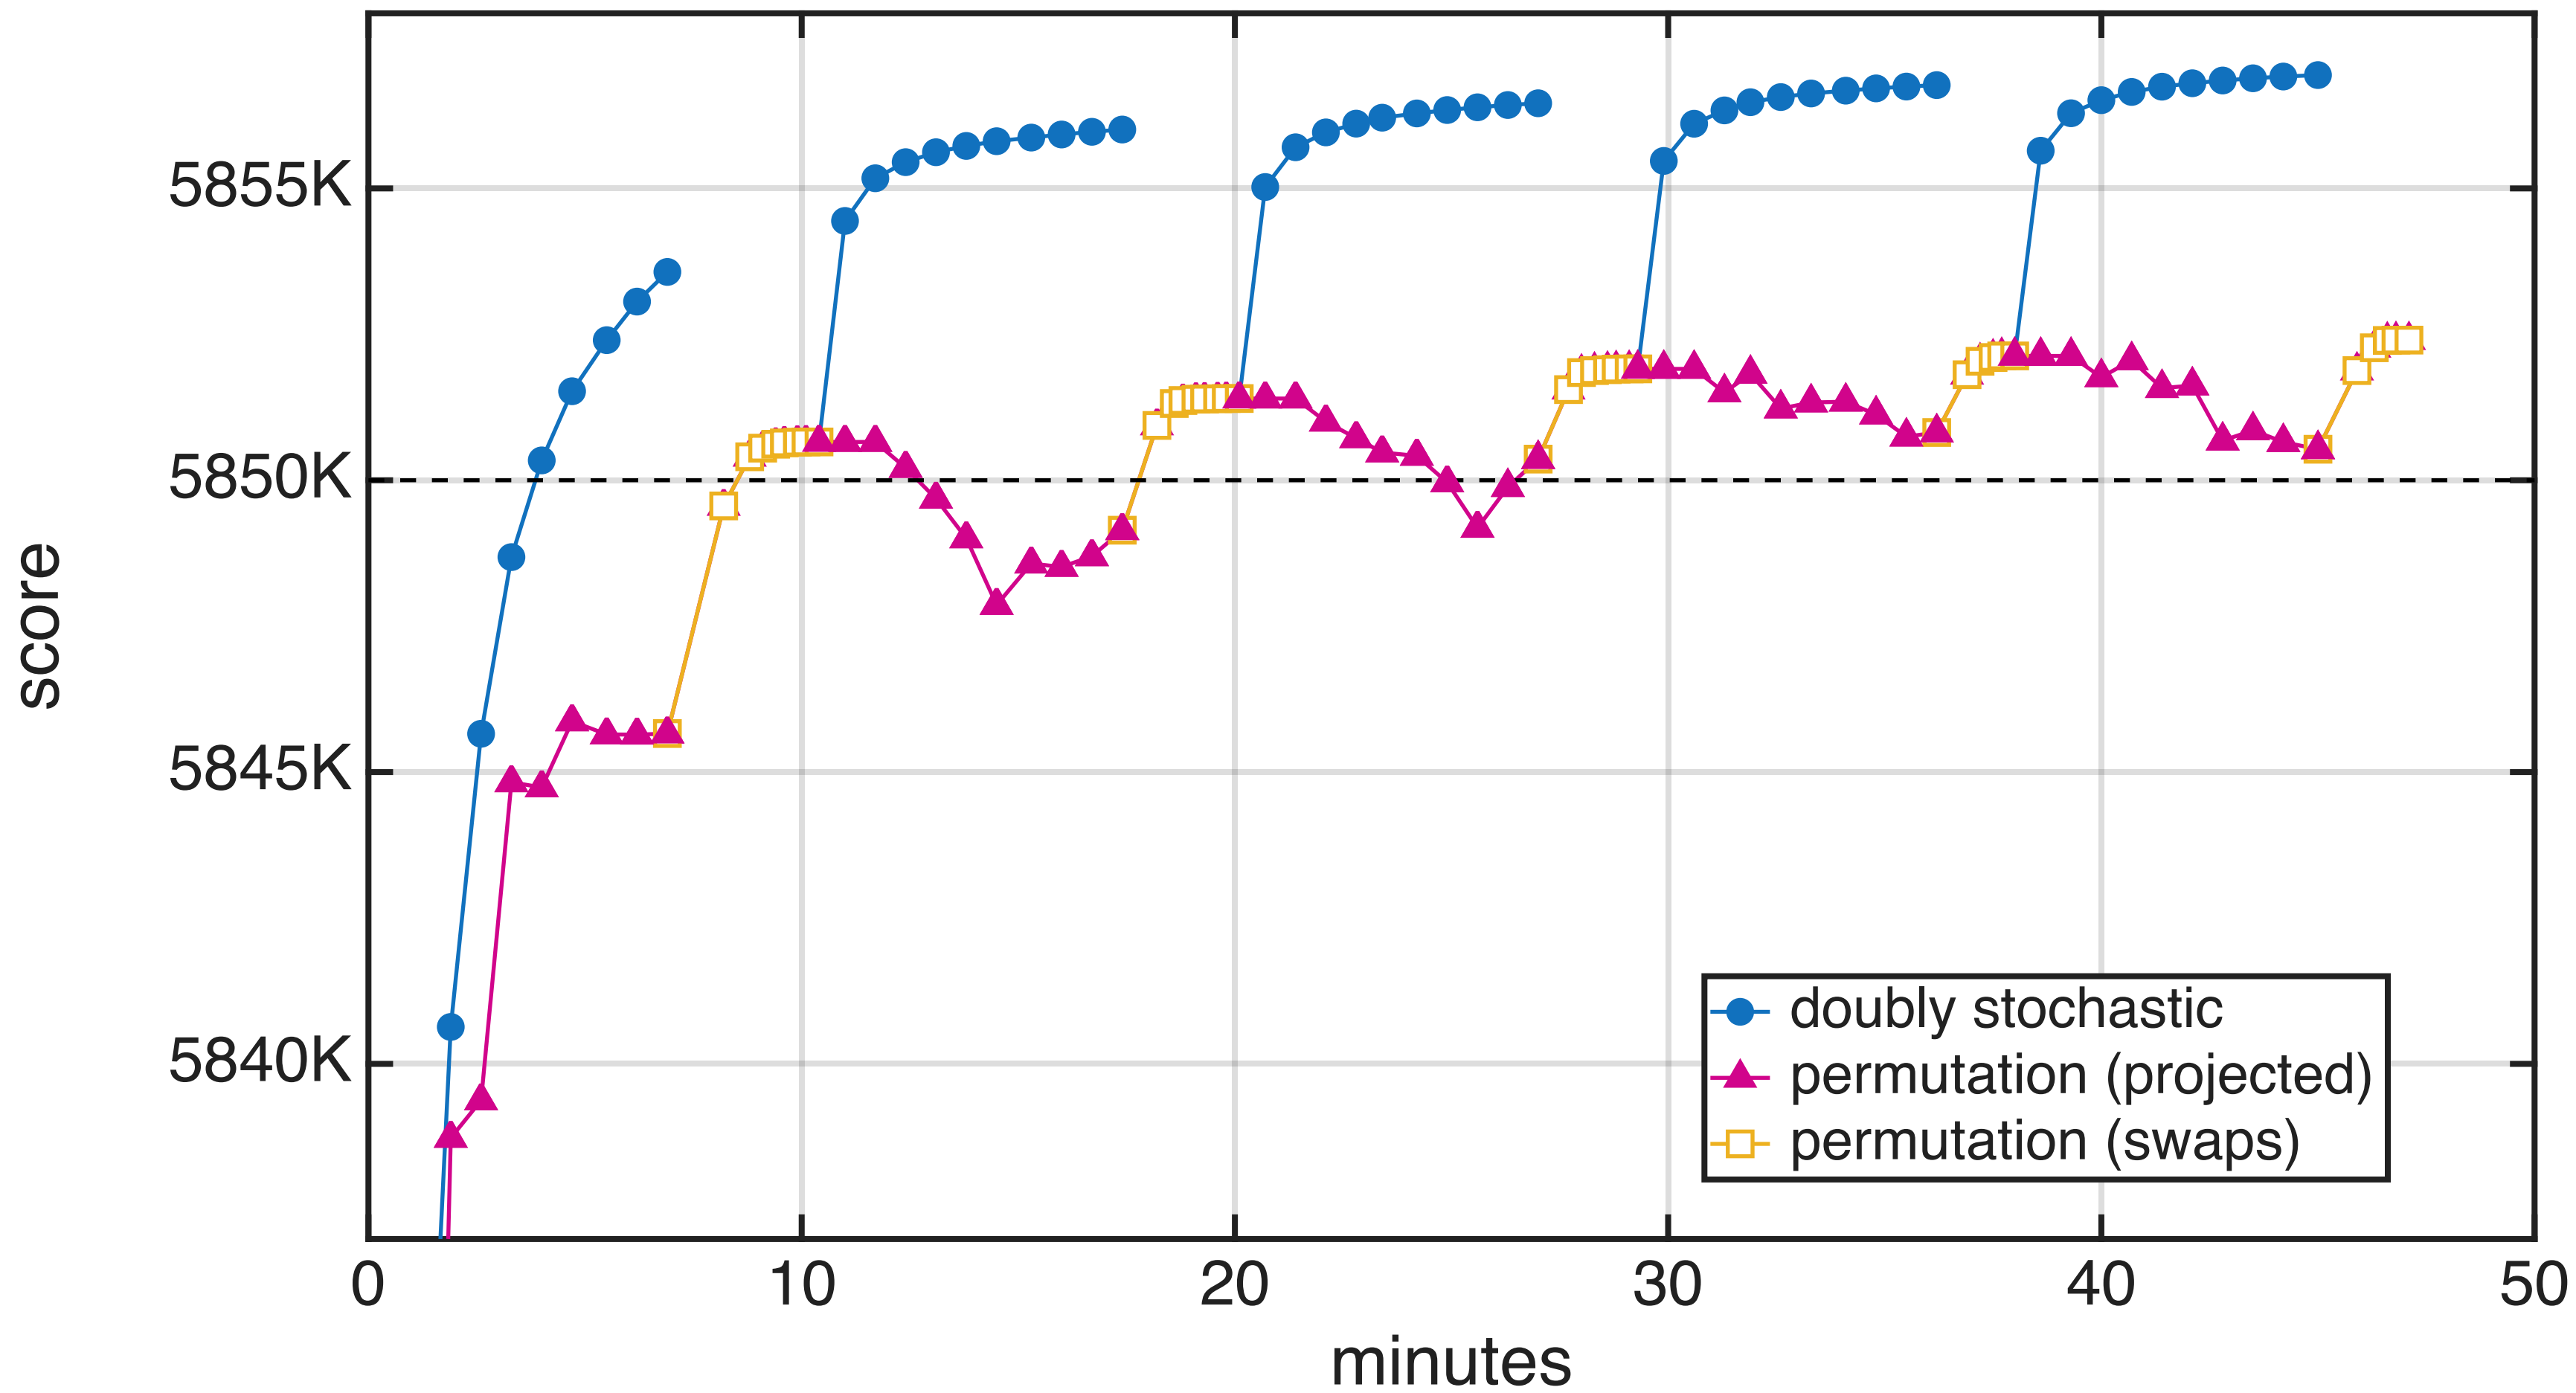

Supplement: supplementary_material [file fig_acdc.pdf › supplementary material/figs/fig_acdc.pdf]

# continuous relaxation

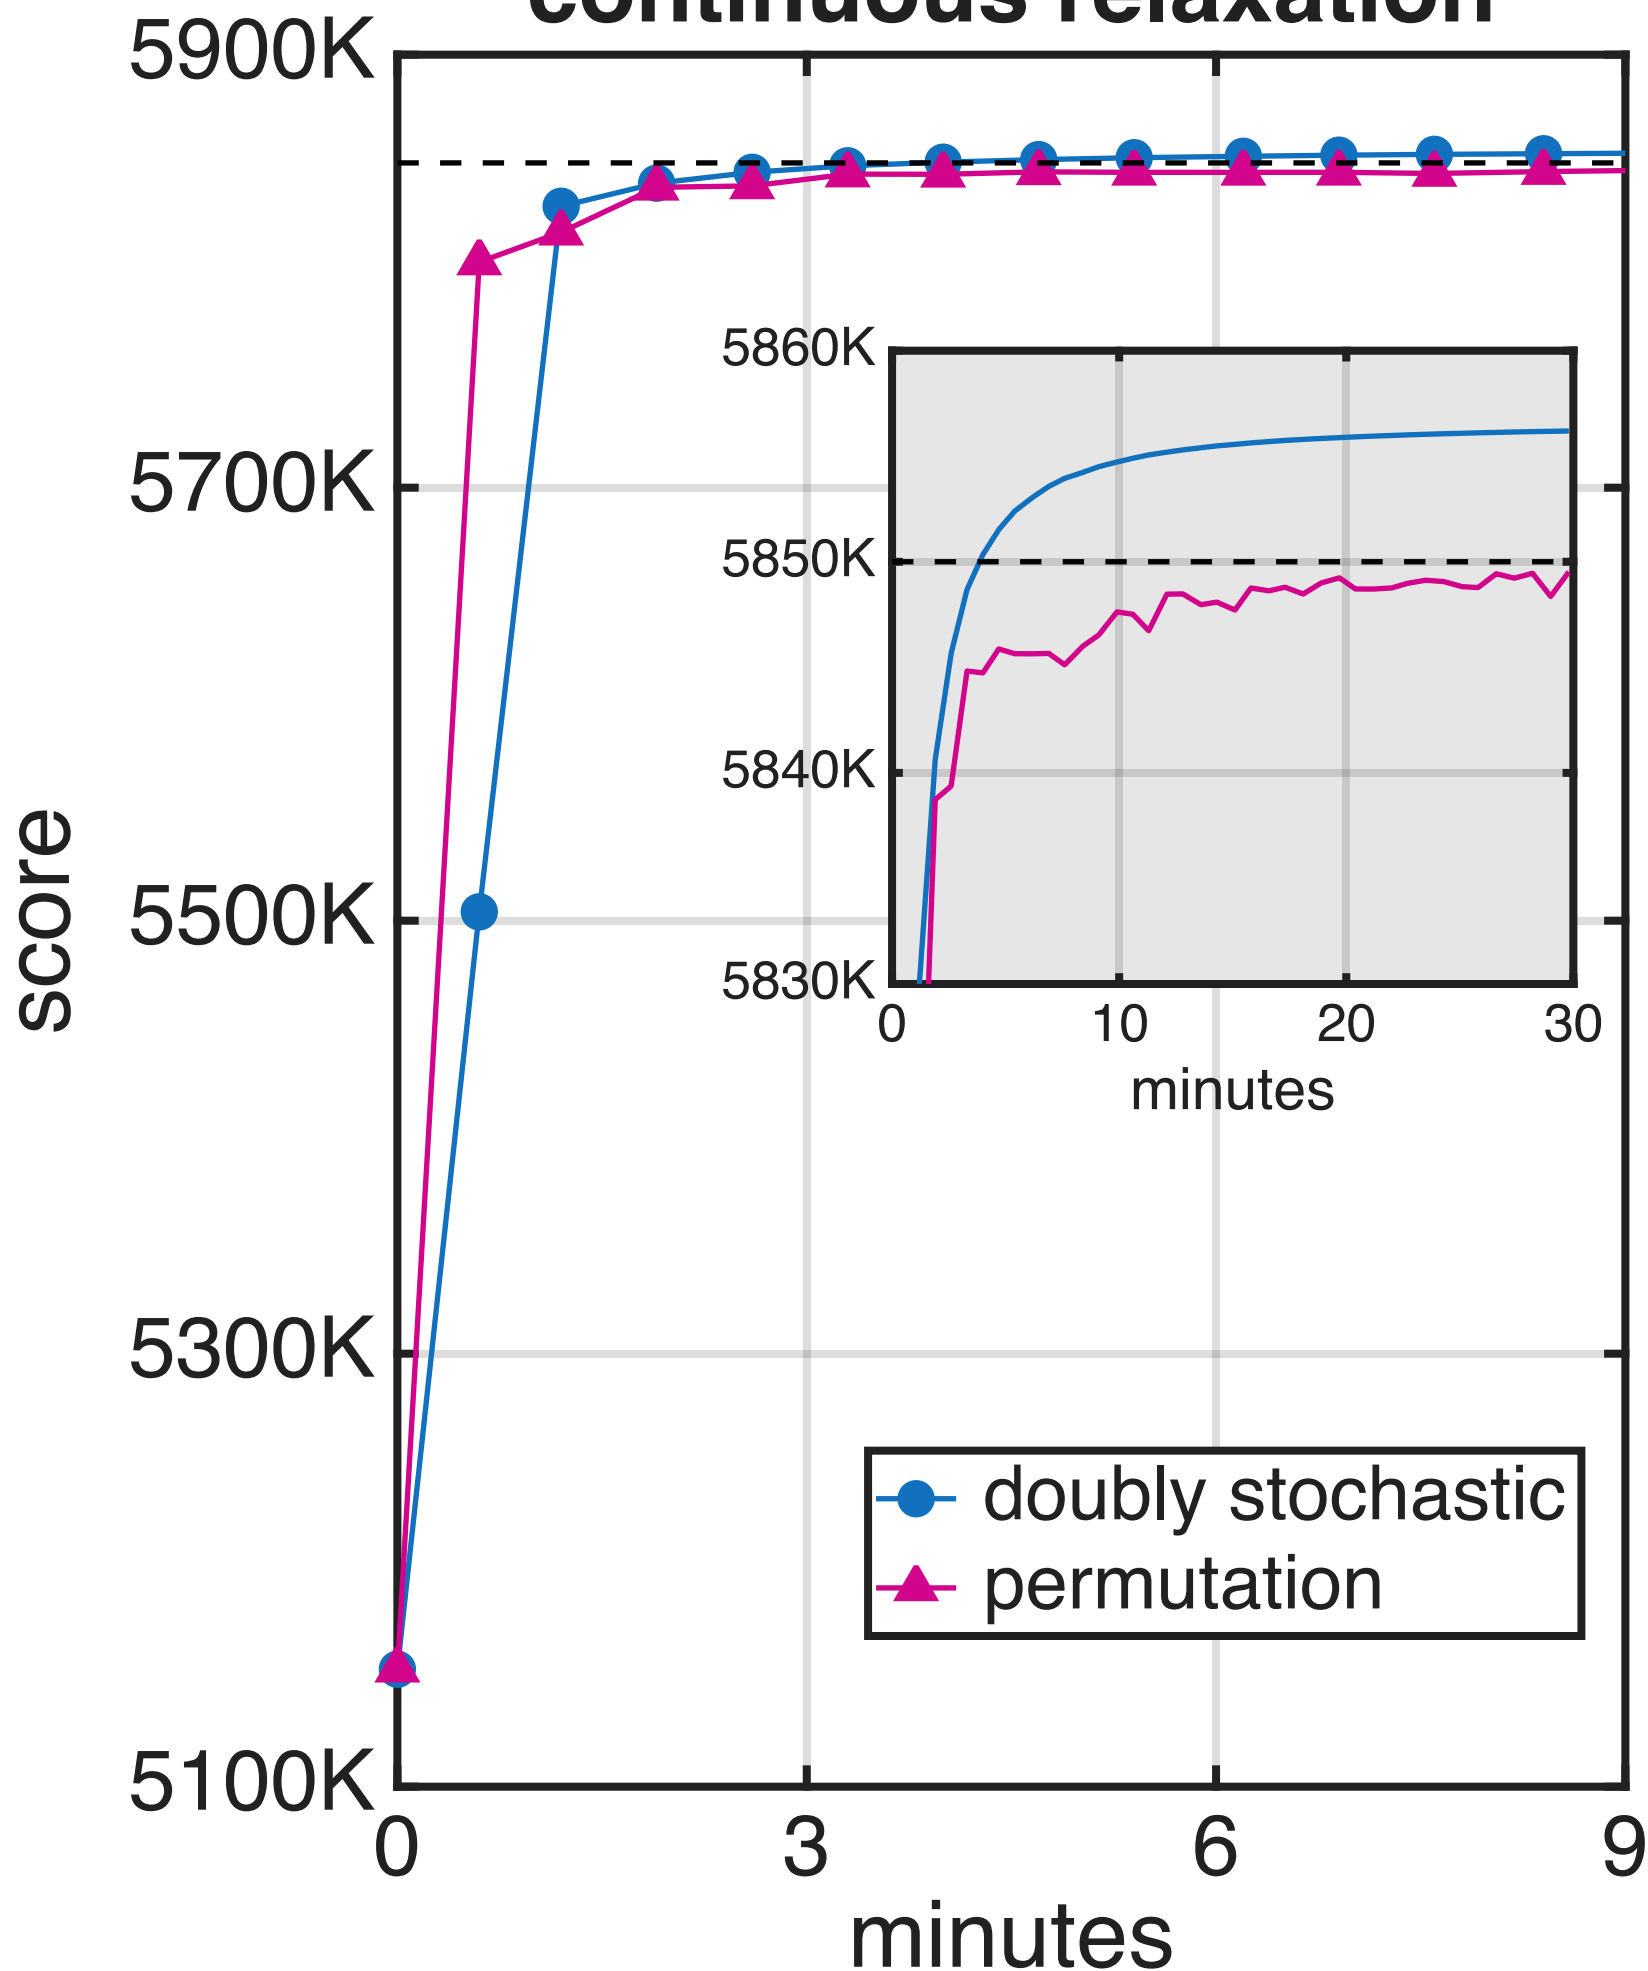

Supplement: supplementary_material [file fig_continuous.pdf › supplementary material/figs/fig_continuous.pdf]

# discrete search

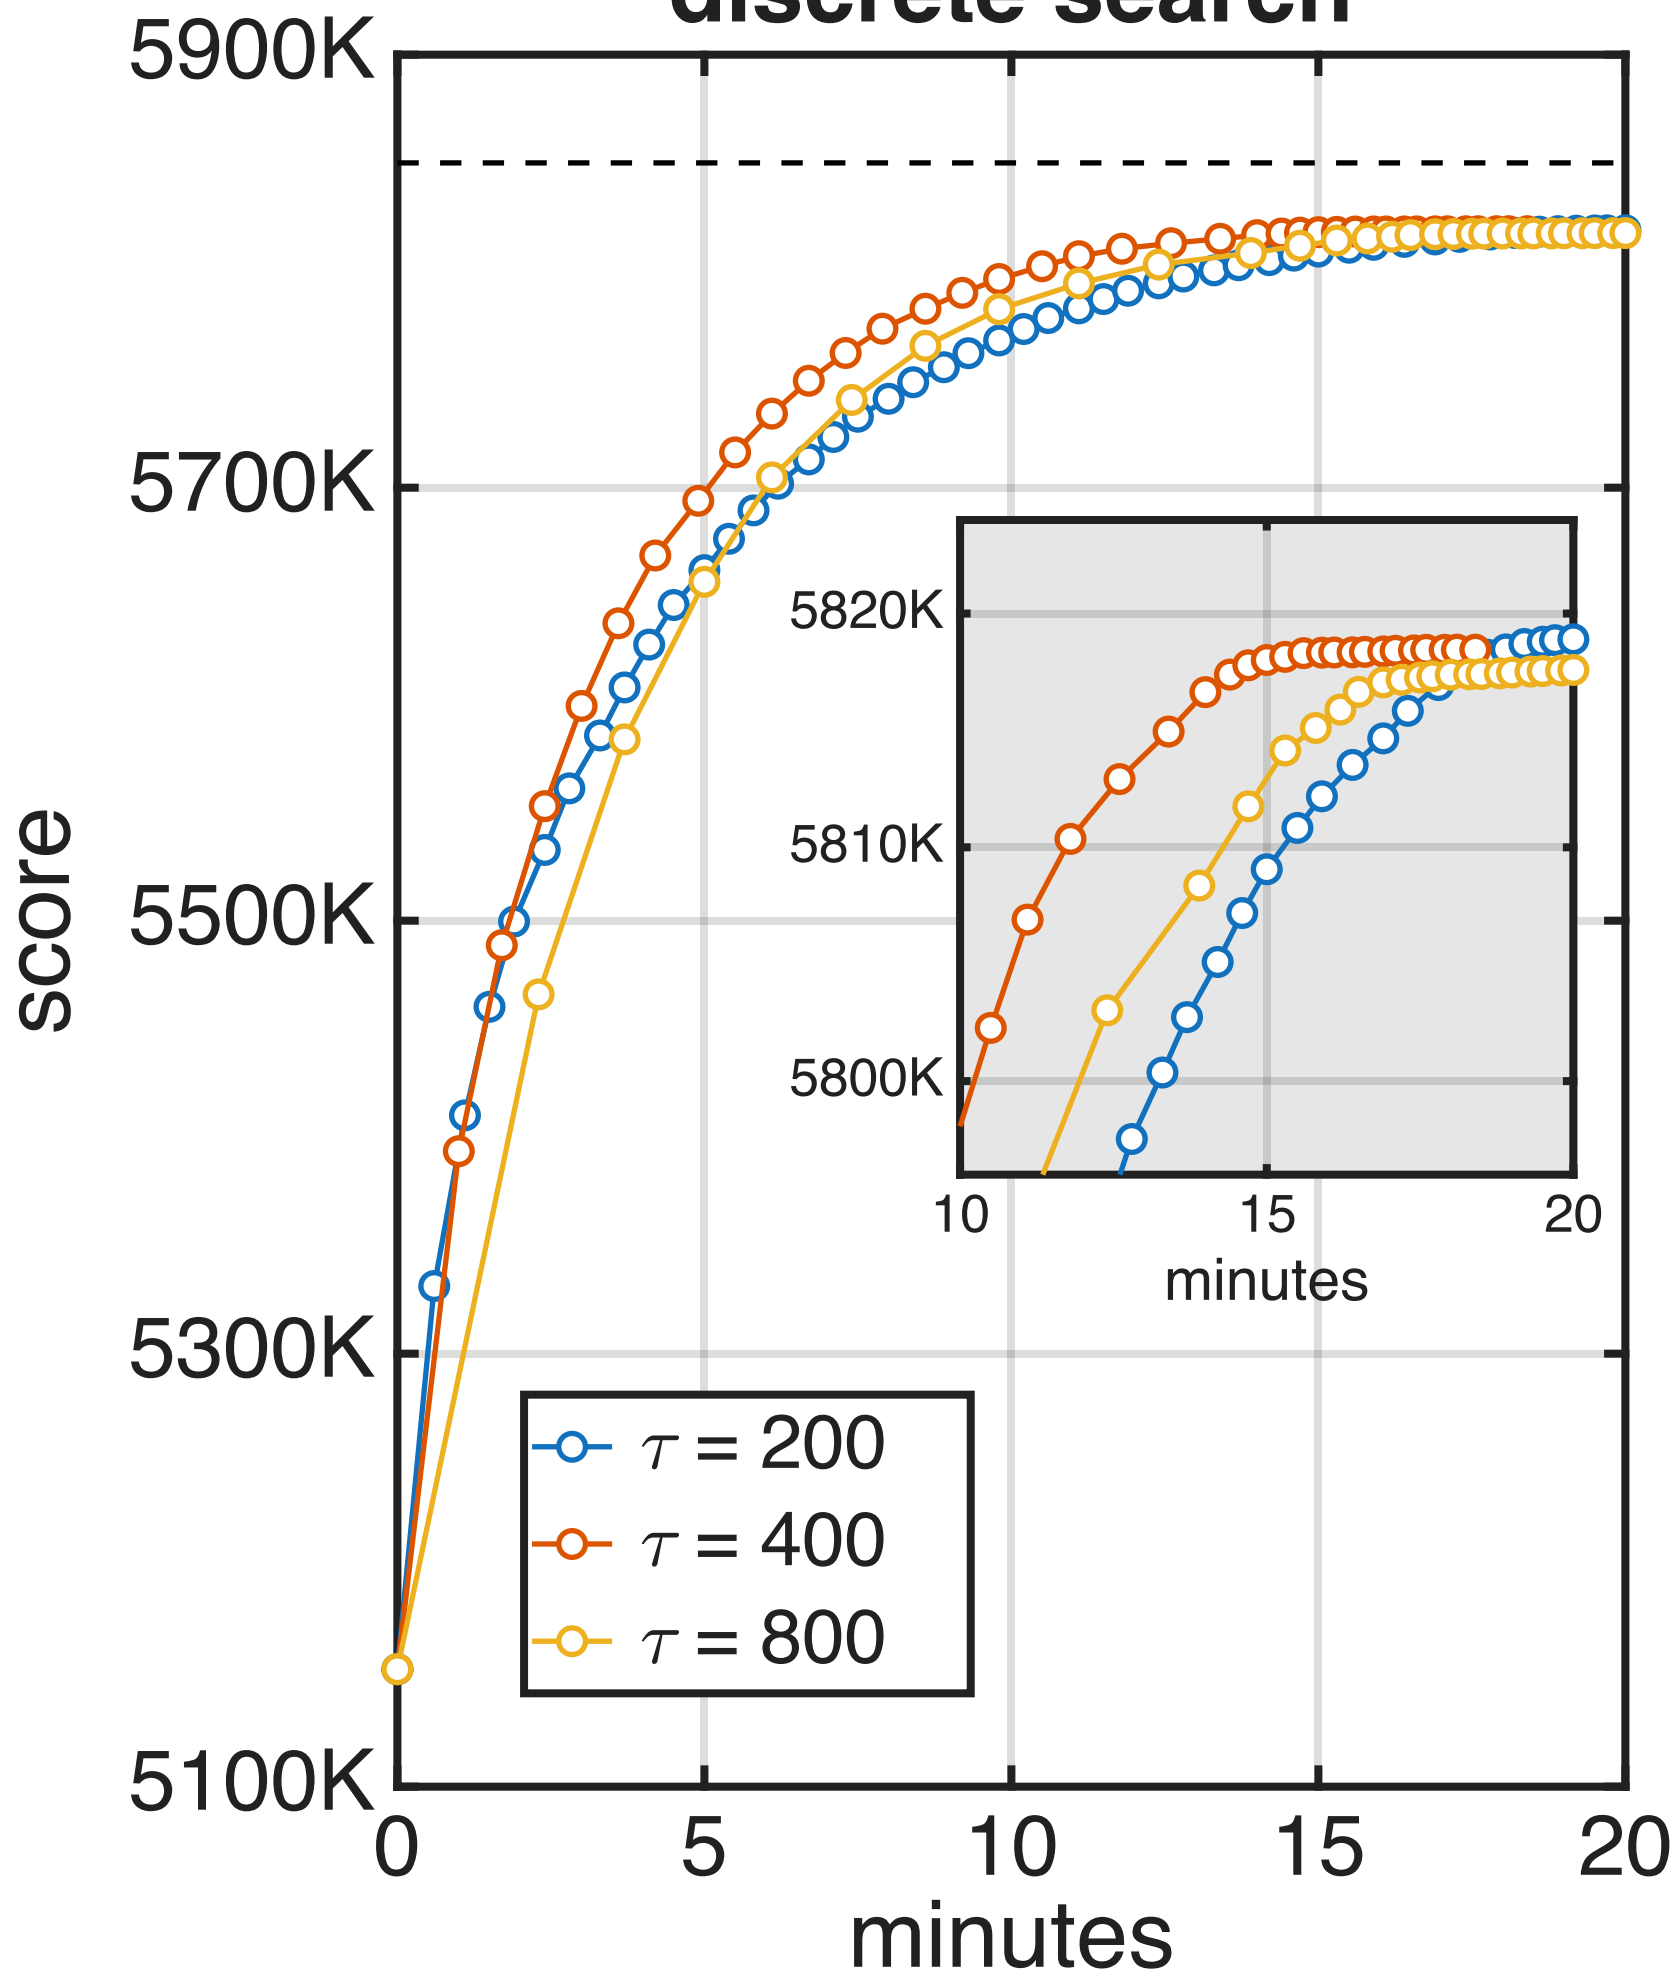

Supplement: supplementary_material [file fig_discrete.pdf › supplementary material/figs/fig_discrete.pdf]
